# Supplementary material for: Differentiation between Weissella cibaria and Weissella confusa Using Machine-Learning-Combined MALDI-TOF MS
Source: MDPI journal article supplement (doi:10.3390/ijms241311009), 2023-07-02
Supplement: s1 [file s1]

## **Supplementary Materials**

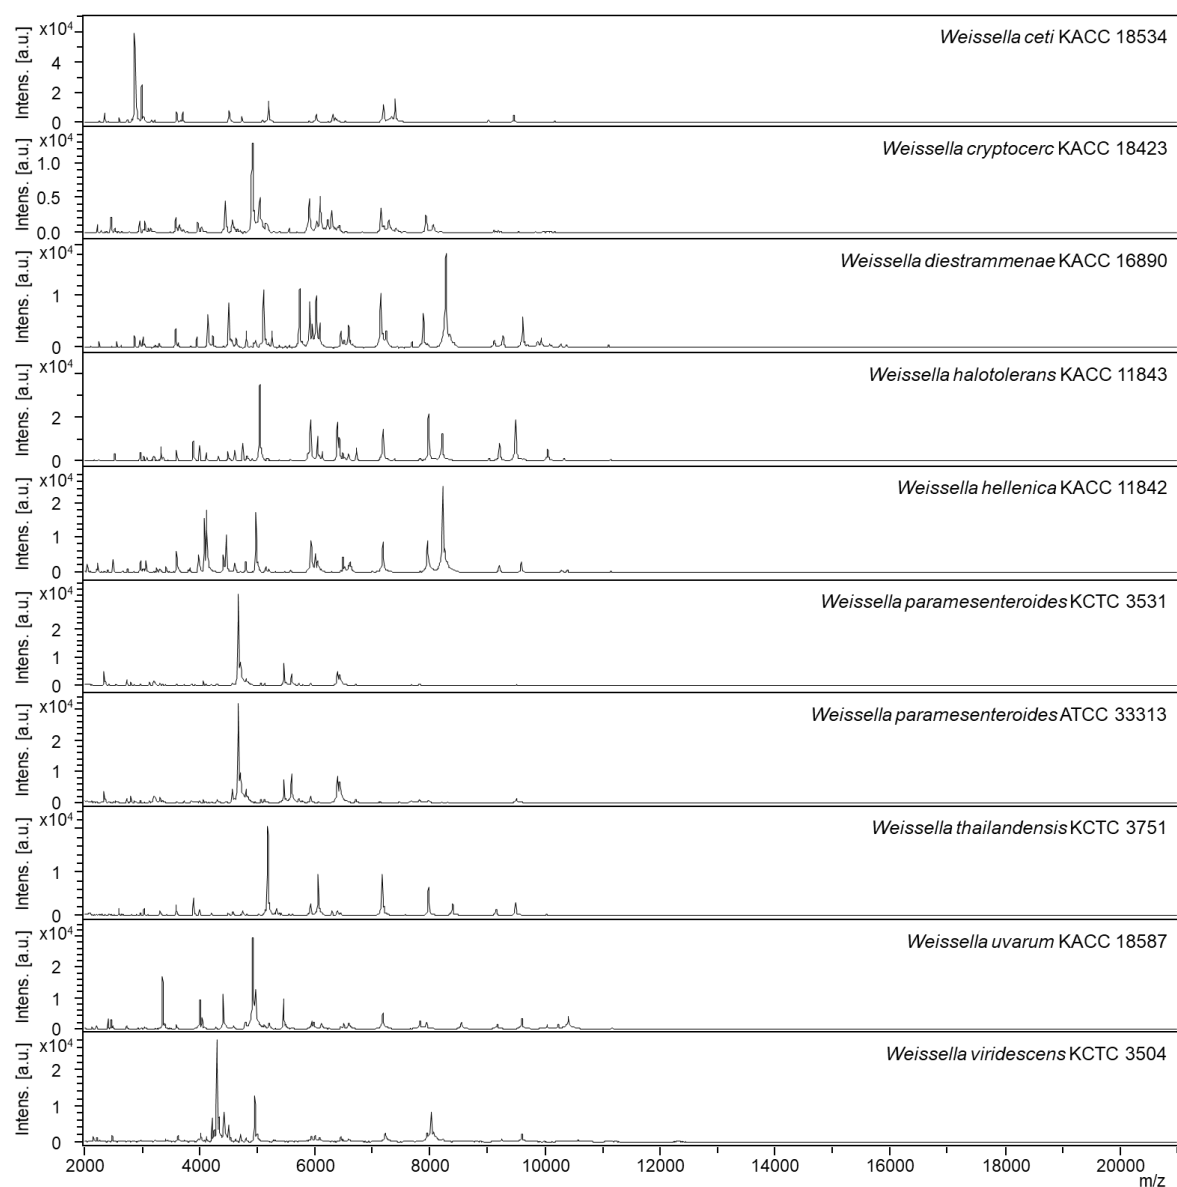

**Supplementary Figure S1.** Mass spectra of reference strains of non-target *Weissella* species;  $m/z$ , mass-to-charge ratio; a.u., arbitrary units.

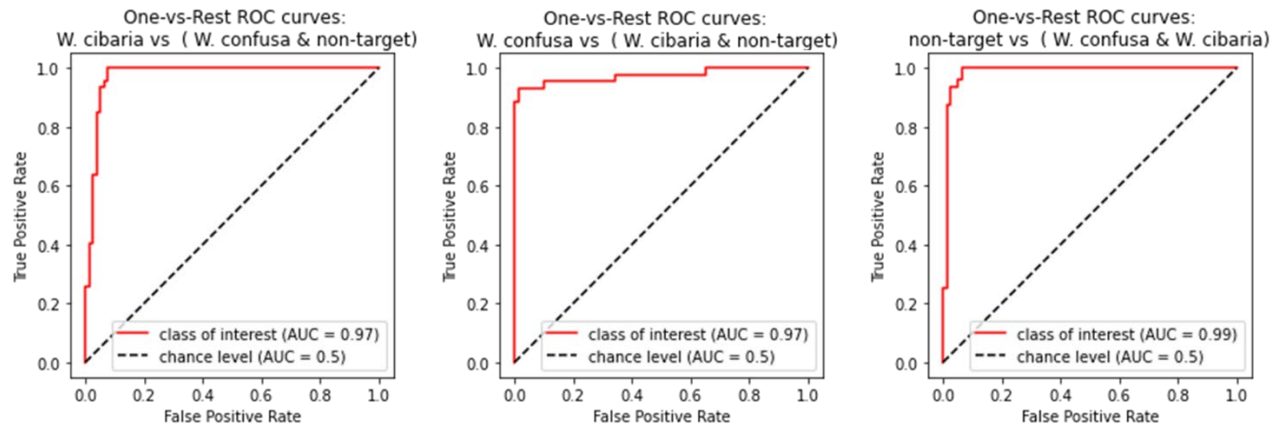

### Supplementary Figure S2.

The developed ANN model was utilized to analyze the ROC curves and AUC, showing the following: (Left) The classification performance between *W. cibaria* and the other two classes, (middle) The classification performance between *W. confusa* and the other two classes, (Right) The classification performance between non-target samples and the other two classes.

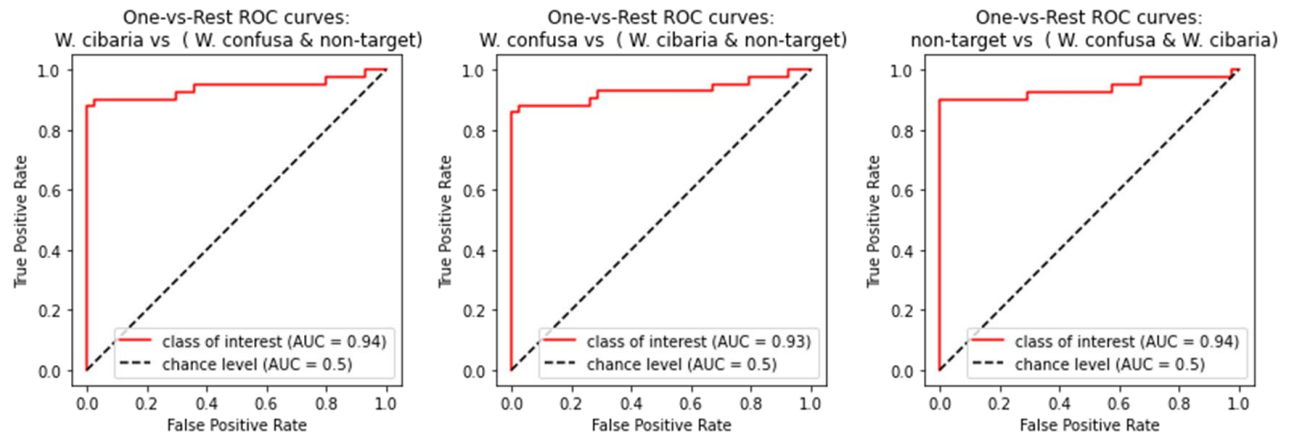

### Supplementary Figure S3.

The developed PCA-KNN model was utilized to analyze the ROC curves and AU, showing the following: (Left) The classification performance between *W. cibaria* and the other two classes, (middle) The classification performance between *W. confusa* and the other two classes, (Right) The classification performance between non-target samples and the other two classes.

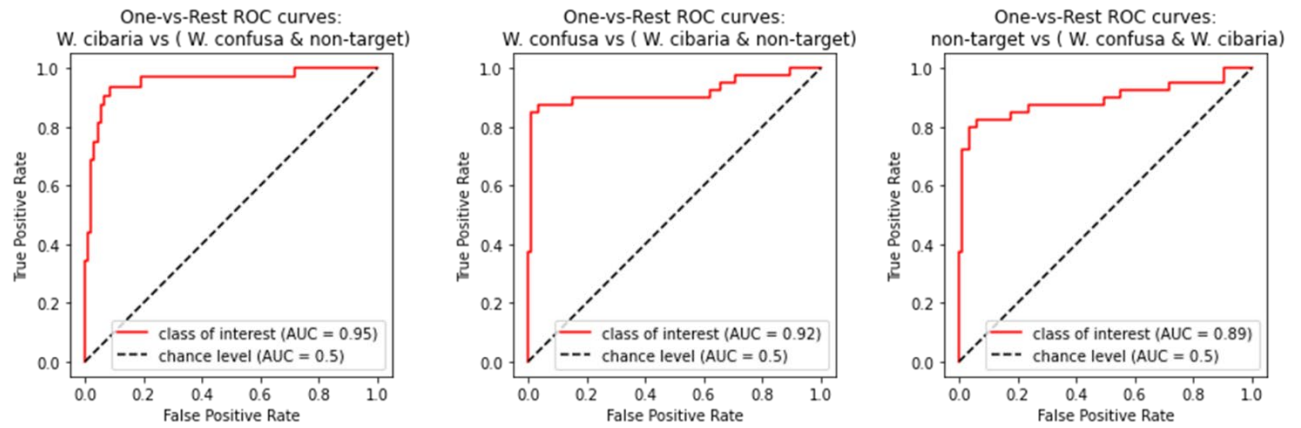

**Supplementary Figure S4.**

The developed SVM-sigmoid model was utilized to analyze the ROC curves and AUC, showing the following: (Left) The classification performance between *W. cibaria* and the other two classes, (middle) The classification performance between *W. confusa* and the other two classes, (Right) The classification performance between non-target samples and the other two classes.

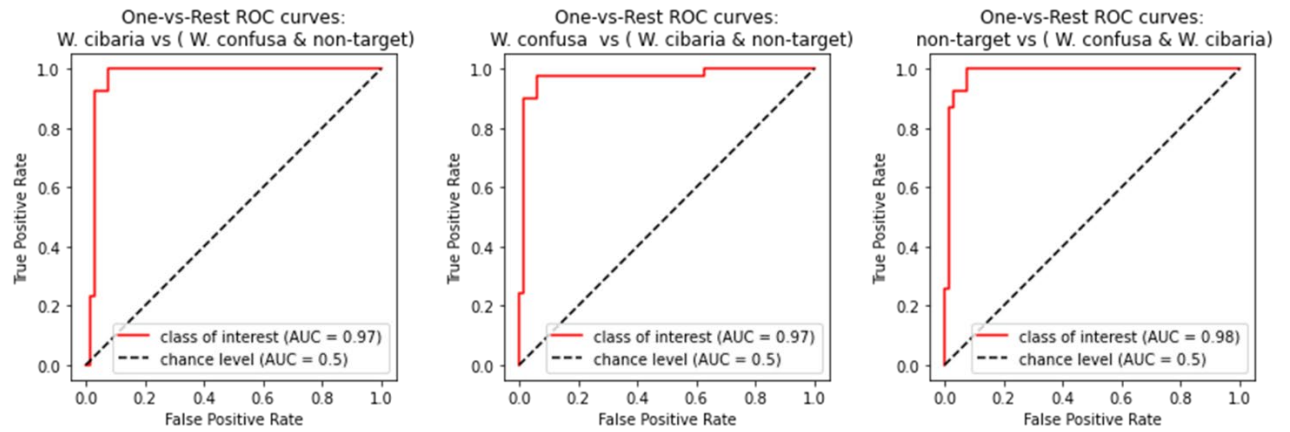

**Supplementary Figure S5.**

The developed Random Forest model was utilized to analyze the ROC curves and AUC, showing the following: (Left) The classification performance between *W. cibaria* and the other two classes, (middle) The classification performance between *W. confusa* and the other two classes, (Right) The classification performance between non-target samples and the other two classes.

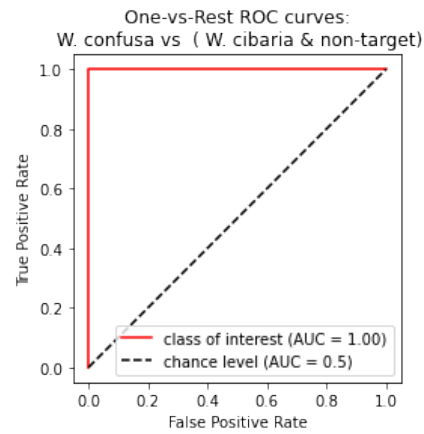

### Supplementary Figure S6.

The developed Sigmoid-RBF model was employed for the analysis of ROC curves and AUC, achieving a classification accuracy of 1.0 across all three categories.

**Supplementary Table S1.** Identification of *W. cibaria*, *W. confusa*, and non-target strains by MALDI-TOF MS with BioTyper database and specific real-time PCR

| Sample ID  | Specific real-time PCR   | MALDI-TOF MS with bioTyper database |             |                              |             |
|------------|--------------------------|-------------------------------------|-------------|------------------------------|-------------|
|            |                          | Organism (best match)               | Score Value | Organism (second-best match) | Score Value |
| cibaria_01 | <i>Weissella cibaria</i> | <i>Weissella cibaria</i>            | 2.30        | <i>Weissella cibaria</i>     | 2.11        |
| cibaria_02 | <i>Weissella cibaria</i> | <i>Weissella cibaria</i>            | 2.40        | <i>Weissella cibaria</i>     | 2.18        |
| cibaria_03 | <i>Weissella cibaria</i> | <i>Weissella cibaria</i>            | 2.43        | <i>Weissella cibaria</i>     | 2.22        |
| cibaria_04 | <i>Weissella cibaria</i> | <i>Weissella cibaria</i>            | 2.35        | <i>Weissella cibaria</i>     | 2.11        |
| cibaria_05 | <i>Weissella cibaria</i> | <i>Weissella cibaria</i>            | 2.36        | <i>Weissella cibaria</i>     | 2.15        |
| cibaria_06 | <i>Weissella cibaria</i> | <i>Weissella cibaria</i>            | 2.38        | <i>Weissella cibaria</i>     | 2.21        |
| cibaria_07 | <i>Weissella cibaria</i> | <i>Weissella cibaria</i>            | 2.32        | <i>Weissella cibaria</i>     | 2.27        |
| cibaria_08 | <i>Weissella cibaria</i> | <i>Weissella cibaria</i>            | 2.39        | <i>Weissella cibaria</i>     | 2.25        |
| cibaria_09 | <i>Weissella cibaria</i> | <i>Weissella cibaria</i>            | 2.20        | <i>Weissella cibaria</i>     | 2.18        |
| cibaria_10 | <i>Weissella cibaria</i> | <i>Weissella cibaria</i>            | 2.33        | <i>Weissella cibaria</i>     | 2.13        |
| cibaria_11 | <i>Weissella cibaria</i> | <i>Weissella cibaria</i>            | 2.11        | <i>Weissella cibaria</i>     | 2.01        |
| cibaria_12 | <i>Weissella cibaria</i> | <i>Weissella cibaria</i>            | 2.16        | <i>Weissella cibaria</i>     | 2.13        |
| cibaria_13 | <i>Weissella cibaria</i> | <i>Weissella cibaria</i>            | 2.42        | <i>Weissella cibaria</i>     | 2.11        |
| cibaria_14 | <i>Weissella cibaria</i> | <i>Weissella cibaria</i>            | 2.17        | <i>Weissella cibaria</i>     | 2.12        |
| cibaria_15 | <i>Weissella cibaria</i> | <i>Weissella cibaria</i>            | 2.19        | <i>Weissella cibaria</i>     | 2.15        |
| cibaria_16 | <i>Weissella cibaria</i> | <i>Weissella cibaria</i>            | 2.12        | <i>Weissella cibaria</i>     | 2.07        |
| cibaria_17 | <i>Weissella cibaria</i> | <i>Weissella cibaria</i>            | 2.05        | <i>Weissella cibaria</i>     | 2.05        |
| cibaria_18 | <i>Weissella cibaria</i> | <i>Weissella cibaria</i>            | 2.24        | <i>Weissella cibaria</i>     | 2.08        |
| cibaria_19 | <i>Weissella cibaria</i> | <i>Weissella cibaria</i>            | 2.23        | <i>Weissella cibaria</i>     | 2.23        |
| cibaria_20 | <i>Weissella cibaria</i> | <i>Weissella cibaria</i>            | 2.21        | <i>Weissella cibaria</i>     | 2.14        |
| cibaria_21 | <i>Weissella cibaria</i> | <i>Weissella cibaria</i>            | 2.33        | <i>Weissella cibaria</i>     | 2.31        |
| cibaria_22 | <i>Weissella cibaria</i> | <i>Weissella cibaria</i>            | 2.37        | <i>Weissella cibaria</i>     | 2.35        |
| cibaria_23 | <i>Weissella cibaria</i> | <i>Weissella cibaria</i>            | 2.38        | <i>Weissella cibaria</i>     | 2.35        |
| cibaria_24 | <i>Weissella cibaria</i> | <i>Weissella cibaria</i>            | 2.36        | <i>Weissella cibaria</i>     | 2.25        |
| cibaria_25 | <i>Weissella cibaria</i> | <i>Weissella cibaria</i>            | 2.31        | <i>Weissella cibaria</i>     | 2.22        |
| cibaria_26 | <i>Weissella cibaria</i> | <i>Weissella cibaria</i>            | 2.31        | <i>Weissella cibaria</i>     | 2.24        |
| cibaria_27 | <i>Weissella cibaria</i> | <i>Weissella cibaria</i>            | 2.03        | <i>Weissella cibaria</i>     | 2.01        |
| cibaria_28 | <i>Weissella cibaria</i> | <i>Weissella cibaria</i>            | 2.30        | <i>Weissella cibaria</i>     | 2.29        |
| cibaria_29 | <i>Weissella cibaria</i> | <i>Weissella cibaria</i>            | 2.12        | <i>Weissella cibaria</i>     | 2.12        |



|                      |                          |                          |      |                          |      |
|----------------------|--------------------------|--------------------------|------|--------------------------|------|
| cibaria_30           | <i>Weissella cibaria</i> | <i>Weissella cibaria</i> | 2.32 | <i>Weissella cibaria</i> | 2.09 |
| cibaria_31           | <i>Weissella cibaria</i> | <i>Weissella cibaria</i> | 2.26 | <i>Weissella cibaria</i> | 2.19 |
| cibaria_32           | <i>Weissella cibaria</i> | <i>Weissella cibaria</i> | 2.11 | <i>Weissella cibaria</i> | 2.09 |
| cibaria_33           | <i>Weissella cibaria</i> | <i>Weissella cibaria</i> | 2.09 | <i>Weissella cibaria</i> | 2.07 |
| cibaria_34           | <i>Weissella cibaria</i> | <i>Weissella cibaria</i> | 2.27 | <i>Weissella cibaria</i> | 2.26 |
| cibaria_35           | <i>Weissella cibaria</i> | <i>Weissella cibaria</i> | 2.15 | <i>Weissella cibaria</i> | 2.03 |
| cibaria_36           | <i>Weissella cibaria</i> | <i>Weissella cibaria</i> | 2.34 | <i>Weissella cibaria</i> | 2.24 |
| cibaria_37           | <i>Weissella cibaria</i> | <i>Weissella cibaria</i> | 2.23 | <i>Weissella cibaria</i> | 2.20 |
| cibaria_38           | <i>Weissella cibaria</i> | <i>Weissella cibaria</i> | 2.32 | <i>Weissella cibaria</i> | 2.22 |
| cibaria_39           | <i>Weissella cibaria</i> | <i>Weissella cibaria</i> | 2.11 | <i>Weissella cibaria</i> | 2.00 |
| cibaria_40           | <i>Weissella cibaria</i> | <i>Weissella cibaria</i> | 2.30 | <i>Weissella cibaria</i> | 2.13 |
| cibaria_41           | <i>Weissella cibaria</i> | <i>Weissella cibaria</i> | 2.22 | <i>Weissella cibaria</i> | 2.10 |
| cibaria_42           | <i>Weissella cibaria</i> | <i>Weissella cibaria</i> | 2.16 | <i>Weissella cibaria</i> | 1.99 |
| cibaria_43           | <i>Weissella cibaria</i> | <i>Weissella cibaria</i> | 2.06 | <i>Weissella cibaria</i> | 2.01 |
| W. cibaria KCTC 3746 | <i>Weissella cibaria</i> | <i>Weissella cibaria</i> | 2.16 | <i>Weissella cibaria</i> | 2.08 |
| confusa_01           | <i>Weissella confusa</i> | <i>Weissella confusa</i> | 2.09 | <i>Weissella cibaria</i> | 2.08 |
| confusa_02           | <i>Weissella confusa</i> | <i>Weissella confusa</i> | 2.03 | <i>Weissella cibaria</i> | 2.03 |
| confusa_03           | <i>Weissella confusa</i> | <i>Weissella cibaria</i> | 1.91 | <i>Weissella cibaria</i> | 1.90 |
| confusa_04           | <i>Weissella confusa</i> | <i>Weissella cibaria</i> | 1.99 | <i>Weissella confusa</i> | 1.85 |
| confusa_05           | <i>Weissella confusa</i> | <i>Weissella confusa</i> | 2.08 | <i>Weissella cibaria</i> | 2.07 |
| confusa_06           | <i>Weissella confusa</i> | <i>Weissella cibaria</i> | 2.12 | <i>Weissella cibaria</i> | 2.06 |
| confusa_07           | <i>Weissella confusa</i> | <i>Weissella confusa</i> | 1.99 | <i>Weissella confusa</i> | 1.89 |
| confusa_08           | <i>Weissella confusa</i> | <i>Weissella confusa</i> | 1.95 | <i>Weissella confusa</i> | 1.94 |
| confusa_09           | <i>Weissella confusa</i> | <i>Weissella confusa</i> | 1.97 | <i>Weissella cibaria</i> | 1.92 |
| confusa_10           | <i>Weissella confusa</i> | <i>Weissella cibaria</i> | 1.90 | <i>Weissella confusa</i> | 1.88 |
| confusa_11           | <i>Weissella confusa</i> | <i>Weissella confusa</i> | 2.10 | <i>Weissella cibaria</i> | 2.02 |
| confusa_12           | <i>Weissella confusa</i> | <i>Weissella cibaria</i> | 2.05 | <i>Weissella confusa</i> | 1.96 |
| confusa_13           | <i>Weissella confusa</i> | <i>Weissella cibaria</i> | 2.08 | <i>Weissella confusa</i> | 2.04 |
| confusa_14           | <i>Weissella confusa</i> | <i>Weissella cibaria</i> | 1.96 | <i>Weissella confusa</i> | 1.88 |
| confusa_15           | <i>Weissella confusa</i> | <i>Weissella cibaria</i> | 1.89 | <i>Weissella confusa</i> | 1.81 |
| confusa_16           | <i>Weissella confusa</i> | <i>Weissella cibaria</i> | 1.95 | <i>Weissella confusa</i> | 1.94 |
| confusa_17           | <i>Weissella confusa</i> | <i>Weissella confusa</i> | 2.01 | <i>Weissella cibaria</i> | 1.87 |
| confusa_18           | <i>Weissella confusa</i> | <i>Weissella confusa</i> | 1.95 | <i>Weissella cibaria</i> | 1.91 |
| confusa_19           | <i>Weissella confusa</i> | <i>Weissella cibaria</i> | 2.02 | <i>Weissella confusa</i> | 1.97 |
| confusa_20           | <i>Weissella confusa</i> | <i>Weissella confusa</i> | 2.07 | <i>Weissella confusa</i> | 1.97 |

|                             |                                |                                     |      |                                     |      |
|-----------------------------|--------------------------------|-------------------------------------|------|-------------------------------------|------|
| confusa_21                  | <i>Weissella confusa</i>       | <i>Weissella cibaria</i>            | 2.13 | <i>Weissella confusa</i>            | 2.03 |
| confusa_22                  | <i>Weissella confusa</i>       | <i>Weissella cibaria</i>            | 2.08 | <i>Weissella cibaria</i>            | 2.03 |
| confusa_23                  | <i>Weissella confusa</i>       | <i>Weissella cibaria</i>            | 2.08 | <i>Weissella confusa</i>            | 2.07 |
| confusa_24                  | <i>Weissella confusa</i>       | <i>Weissella cibaria</i>            | 2.08 | <i>Weissella confusa</i>            | 2.01 |
| confusa_25                  | <i>Weissella confusa</i>       | <i>Weissella confusa</i>            | 2.02 | <i>Weissella confusa</i>            | 2.00 |
| confusa_26                  | <i>Weissella confusa</i>       | <i>Weissella cibaria</i>            | 2.05 | <i>Weissella confusa</i>            | 2.01 |
| confusa_27                  | <i>Weissella confusa</i>       | <i>Weissella cibaria</i>            | 2.10 | <i>Weissella confusa</i>            | 2.05 |
| confusa_28                  | <i>Weissella confusa</i>       | <i>Weissella cibaria</i>            | 2.04 | <i>Weissella confusa</i>            | 1.98 |
| confusa_29                  | <i>Weissella confusa</i>       | <i>Weissella confusa</i>            | 2.06 | <i>Weissella cibaria</i>            | 2.02 |
| confusa_30                  | <i>Weissella confusa</i>       | <i>Weissella cibaria</i>            | 2.13 | <i>Weissella confusa</i>            | 2.12 |
| confusa_31                  | <i>Weissella confusa</i>       | <i>Weissella cibaria</i>            | 1.74 | <i>Weissella cibaria</i>            | 1.73 |
| confusa_32                  | <i>Weissella confusa</i>       | <i>Weissella cibaria</i>            | 2.09 | <i>Weissella confusa</i>            | 1.94 |
| confusa_33                  | <i>Weissella confusa</i>       | <i>Weissella cibaria</i>            | 2.09 | <i>Weissella cibaria</i>            | 2.04 |
| confusa_34                  | <i>Weissella confusa</i>       | <i>Weissella cibaria</i>            | 2.05 | <i>Weissella cibaria</i>            | 2.02 |
| confusa_35                  | <i>Weissella confusa</i>       | <i>Weissella cibaria</i>            | 2.09 | <i>Weissella cibaria</i>            | 1.96 |
| confusa_36                  | <i>Weissella confusa</i>       | <i>Weissella cibaria</i>            | 2.13 | <i>Weissella confusa</i>            | 2.04 |
| confusa_37                  | <i>Weissella confusa</i>       | <i>Weissella cibaria</i>            | 2.12 | <i>Weissella cibaria</i>            | 2.03 |
| confusa_38                  | <i>Weissella confusa</i>       | <i>Weissella cibaria</i>            | 1.86 | <i>Weissella confusa</i>            | 1.79 |
| confusa_39                  | <i>Weissella confusa</i>       | <i>Weissella cibaria</i>            | 1.79 | <i>Weissella cibaria</i>            | 1.74 |
| confusa_40                  | <i>Weissella confusa</i>       | <i>Weissella confusa</i>            | 2.08 | <i>Weissella cibaria</i>            | 2.00 |
| confusa_41                  | <i>Weissella confusa</i>       | <i>Weissella cibaria</i>            | 1.74 | No Organism Identification Possible | 1.61 |
| confusa_42                  | <i>Weissella confusa</i>       | <i>Weissella confusa</i>            | 1.74 | <i>Weissella cibaria</i>            | 1.71 |
| confusa_43                  | <i>Weissella confusa</i>       | <i>Weissella confusa</i>            | 1.78 | <i>Weissella confusa</i>            | 1.72 |
| confusa_44                  | <i>Weissella confusa</i>       | <i>Weissella cibaria</i>            | 1.74 | <i>Weissella confusa</i>            | 1.72 |
| confusa_45                  | <i>Weissella confusa</i>       | <i>Weissella cibaria</i>            | 1.92 | <i>Weissella confusa</i>            | 1.91 |
| <i>W. confusa</i> KCTC 3499 | <i>Weissella confusa</i>       | <i>Weissella cibaria</i>            | 1.96 | <i>Weissella confusa</i>            | 1.80 |
| nontarget_01                | <i>Weissella ceti</i>          | No Organism Identification Possible | 1.48 | No Organism Identification Possible | 1.35 |
| nontarget_02                | <i>Weissella cryptocerc</i>    | No Organism Identification Possible | 1.26 | No Organism Identification Possible | 1.25 |
| nontarget_03                | <i>Weissella diestrammenae</i> | <i>Weissella diestrammenae</i>      | 2.13 | No Organism Identification Possible | 1.54 |
| nontarget_04                | <i>Weissella halotolerans</i>  | <i>Weissella halotolerans</i>       | 2.22 | <i>Weissella halotolerans</i>       | 1.78 |
| nontarget_05                | <i>Weissella hellenica</i>     | <i>Weissella hellenica</i>          | 2.09 | No Organism Identification Possible | 1.65 |
| nontarget_06                | <i>Weissella hellenica</i>     | <i>Weissella hellenica</i>          | 1.88 | No Organism Identification Possible | 1.61 |
| nontarget_07                | <i>Weissella hellenica</i>     | <i>Weissella hellenica</i>          | 1.83 | No Organism Identification Possible | 1.62 |
| nontarget_08                | <i>Weissella hellenica</i>     | <i>Weissella hellenica</i>          | 1.82 | No Organism Identification Possible | 1.60 |
| nontarget_09                | <i>Weissella hellenica</i>     | <i>Weissella hellenica</i>          | 1.73 | No Organism Identification Possible | 1.38 |

|              |                                    |                                     |      |                                         |
|--------------|------------------------------------|-------------------------------------|------|-----------------------------------------|
| nontarget_10 | <i>Weissella koreensis</i>         | <i>Weissella koreensis</i>          | 2.26 | No Organism Identification Possible1.52 |
| nontarget_11 | <i>Weissella koreensis</i>         | <i>Weissella koreensis</i>          | 2.01 | No Organism Identification Possible1.36 |
| nontarget_12 | <i>Weissella koreensis</i>         | <i>Weissella koreensis</i>          | 2.29 | No Organism Identification Possible1.35 |
| nontarget_13 | <i>Weissella koreensis</i>         | <i>Weissella koreensis</i>          | 2.32 | No Organism Identification Possible1.29 |
| nontarget_14 | <i>Weissella koreensis</i>         | <i>Weissella koreensis</i>          | 2.33 | No Organism Identification Possible1.47 |
| nontarget_15 | <i>Weissella koreensis</i>         | <i>Weissella koreensis</i>          | 2.43 | No Organism Identification Possible1.47 |
| nontarget_16 | <i>Weissella koreensis</i>         | <i>Weissella koreensis</i>          | 2.27 | No Organism Identification Possible1.43 |
| nontarget_17 | <i>Weissella koreensis</i>         | <i>Weissella koreensis</i>          | 2.33 | No Organism Identification Possible1.30 |
| nontarget_18 | <i>Weissella koreensis</i>         | <i>Weissella koreensis</i>          | 2.09 | No Organism Identification Possible1.37 |
| nontarget_19 | <i>Weissella koreensis</i>         | <i>Weissella koreensis</i>          | 2.30 | No Organism Identification Possible1.37 |
| nontarget_20 | <i>Weissella koreensis</i>         | <i>Weissella koreensis</i>          | 2.22 | No Organism Identification Possible1.28 |
| nontarget_21 | <i>Weissella koreensis</i>         | <i>Weissella koreensis</i>          | 2.30 | No Organism Identification Possible1.33 |
| nontarget_22 | <i>Weissella koreensis</i>         | <i>Weissella koreensis</i>          | 1.80 | No Organism Identification Possible1.35 |
| nontarget_23 | <i>Weissella minor</i>             | No Organism Identification Possible | 1.58 | No Organism Identification Possible1.31 |
| nontarget_24 | <i>Weissella paramesenteroides</i> | <i>Weissella paramesenteroides</i>  | 1.97 | <i>Weissella paramesenteroides</i> 1.74 |
| nontarget_25 | <i>Weissella paramesenteroides</i> | <i>Weissella paramesenteroides</i>  | 2.14 | <i>Weissella paramesenteroides</i> 1.87 |
| nontarget_26 | <i>Weissella paramesenteroides</i> | <i>Weissella paramesenteroides</i>  | 2.05 | <i>Weissella paramesenteroides</i> 1.93 |
| nontarget_27 | <i>Weissella paramesenteroides</i> | <i>Weissella paramesenteroides</i>  | 1.94 | <i>Weissella paramesenteroides</i> 1.94 |
| nontarget_28 | <i>Weissella paramesenteroides</i> | <i>Weissella paramesenteroides</i>  | 2.03 | <i>Weissella paramesenteroides</i> 1.94 |
| nontarget_29 | <i>Weissella paramesenteroides</i> | <i>Weissella paramesenteroides</i>  | 1.85 | <i>Weissella paramesenteroides</i> 1.81 |
| nontarget_30 | <i>Weissella paramesenteroides</i> | <i>Weissella paramesenteroides</i>  | 2.03 | <i>Weissella paramesenteroides</i> 1.99 |
| nontarget_31 | <i>Weissella paramesenteroides</i> | <i>Weissella paramesenteroides</i>  | 1.96 | <i>Weissella paramesenteroides</i> 1.90 |
| nontarget_32 | <i>Weissella soli</i>              | No Organism Identification Possible | 1.35 | No Organism Identification Possible1.30 |
| nontarget_33 | <i>Weissella thailandensis</i>     | <i>Weissella thailandensis</i>      | 1.90 | <i>Weissella thailandensis</i> 1.77     |
| nontarget_34 | <i>Weissella uvarum</i>            | <i>Weissella uvarum</i>             | 2.25 | No Organism Identification Possible1.57 |
| nontarget_35 | <i>Weissella viridescens</i>       | <i>Weissella viridescens</i>        | 2.33 | <i>Weissella viridescens</i> 2.13       |

---
